# Supplementary material
Source: publisher figshare collection journal article supplement (https://frontiersin.figshare.com/ndownloader/files/14338034)
Supplement: Supplementary file [file 14338034]

**Table S3.** Summary of proteobacterial phylotypes characterized in different regions.

|    | Characterized Classes |      |      |     |     | Characterized Orders |      |        |     |     | Characterized Families |      |        |     |     |
|----|-----------------------|------|------|-----|-----|----------------------|------|--------|-----|-----|------------------------|------|--------|-----|-----|
|    | Phy                   | SCRP | Pro  | SRP | SOP | Phy                  | SCRP | Pro    | SRP | SOP | Phy                    | SCRP | Pro    | SRP | SOP |
| RP | 0                     | 0    | 0%   | 0   | 0   | 3                    | 0    | 0%     | 0   | 0   | 4                      | 0    | 0%     | 0   | 0   |
| RU | 2                     | 2    | 100% | 1   | 1   | 21                   | 5    | 23.81% | 2   | 3   | 32                     | 7    | 21.88% | 2   | 5   |
| RA | 1                     | 1    | 100% | 1   | 0   | 19                   | 7    | 36.84% | 4   | 3   | 12                     | 10   | 83.33% | 8   | 2   |

RP: Protected wildlife reserve region; RU: Region polluted by human urban activity; RA: Region polluted by human agricultural activity; Phy: Phylotypes; SCRP: Sulfur cycling-related phylotypes; Pro: proportion of sulfur cycling-related phylotypes; SRP: Sulfate-reducing phylotypes; SOP: Sulfur-oxidizing phylotypes.
